# Supplementary material
Source: ML conference proceedings conference paper supplement (https://openaccess.thecvf.com/content/CVPR2024/html/Ranzinger_AM-RADIO_Agglomerative_Vision_CVPR_2024_paper.html)
Supplement: Supplementary file 1 [file Ranzinger_AM-RADIO_Agglomerative_Vision_CVPR_2024_supplemental.pdf]

**AM-RADIO: Agglomerative Vision Foundation Model**  
**Reduce All Domains Into One**

Supplementary Material

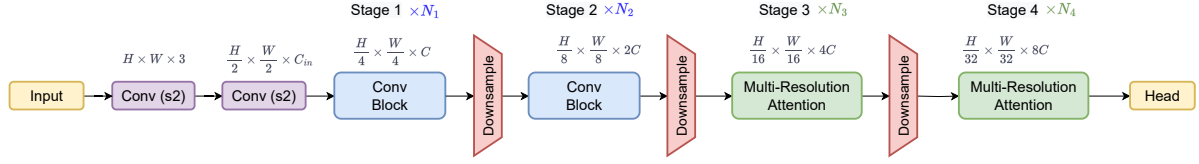

Figure 5. High level architecture of the ERADIO network architecture. Overall architecture is composed of multiple stages: 1) the stem, 2) 2 convolutional blocks from YOLOv8, 3) 2 transformer blocks with multi-resolution windowed self attention.

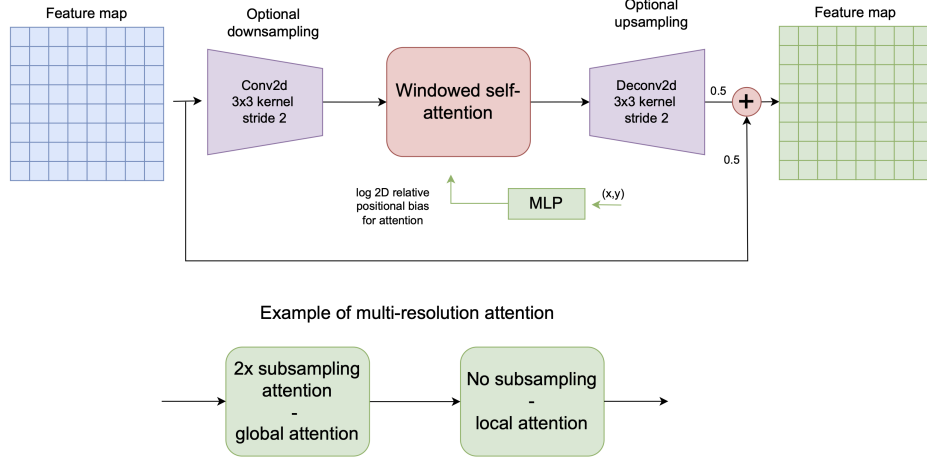

Figure 6. Multi-resolution attention for E-RADIO

## A. E-RADIO architecture details

The architecture of E-RADIO is illustrated in Figure 5. It is a hybrid CNN-Transformer architecture. First 2 stages follow convolution paradigm and have the C2f architecture from YOLOv8 model [29]. The last 2 stages have the Transformer architecture with windowed attention and multi-resolution attention (MRA) structure. Every stage, except the last one, are followed by downsample block. We implement it as a strided convolution with 3x3 kernel and stride 2, followed by batch normalization layer.

### A.1. Multi-Resolution Attention

Standard transformers struggle to scale with high input image resolution because of quadratic complexity of the attention. SWIN [39] proposed to use windowed attention to reduce the complexity of attention. We reuse windowed attention in the E-RADIO. To address for missing communication between windows, SWIN introduced window shifting, unfortunately, it has non-negligible compute cost. Instead, we propose multi-resolution attention inspired by EdgeViT’s Local-Global-Local attention [45]. The idea is illustrated in Figure 6. Every layer in the transformer will have a local windowed attention with optional subsampling via convolutional operator. For example, if subsampling is disabled, then it is just a standard windowed attention. If the subsampling ratio is 2, then the feature map is downsampled by a factor of 2, windowed attention is performed, and then the feature map is upsampled to the original resolution with deconvolution. For FasterViT2 models, we interleave subsampled attention with ratio 2 and the normal attention with no subsampling.

### A.2. Configurations

All models in the family follow the same configuration except the embedding dimension (hide dimension). We simply scale it up with bigger models. Other parameters:

- Input resolution is 224
- In-stem contains 2 3x3 convolutions with stride 2
- Total stages: 2 convolutional and 2 transformer
- First stage takes input feature size of 56x56, has 3 layers with C2f structure from YOLO8 [29].
- Second stage takes input feature size of 28x28, has 3 layers of C2f.

- Third stage takes features of size 14x14, has 5x multi-resolution attention, window size 7.
- Forth stage takes features of size 7x7, has 5x windowed attention of window size 7.
- Embedding dimension for different model variants: XT - 64, T - 80, S - 96, B - 128, L - 192. The smallest XT and T models have [1, 3, 4, 5] layers for each of 4 stages.
- Output features have resolution of 14x14 and are obtained by upsampling the features of stage 4 by 2x with deconvolution and adding to stage 3 features of size 14x14.

## **B. PCA Visualizations**

We visualize various models using PCA to reduce the model's spatial feature dimensionality down to 3 dimensions, and directly map those to RGB. Most models are only able to handle square inputs at fixed resolutions, however DINOv2 and RADIO can handle arbitrary resolutions and aspect ratios, so we visualize them in both settings.



## B.1. Square Models

| Model         | Resolution | Images                                                                               |
|---------------|------------|--------------------------------------------------------------------------------------|
|               |            |    |
| OpenCLIP-H/14 | 224        |    |
| MetaCLIP-H/14 | 224        |    |
| SigLIP-M/14   | 384        |    |
| InternViT-6B  | 224        |    |
|               | 448        |   |
| DFN CLIP      | 378        |  |
| OpenAI CLIP   | 336        |  |
| DINOv2-g      | 518        |  |
| SAM-H         | 1024       |  |
| RADIO         | 512        |  |
|               | 1024       |  |

## B.2. Flexible Models

| Model    | Resolution | Images                                                                               |
|----------|------------|--------------------------------------------------------------------------------------|
| DINOv2-g | 518        | 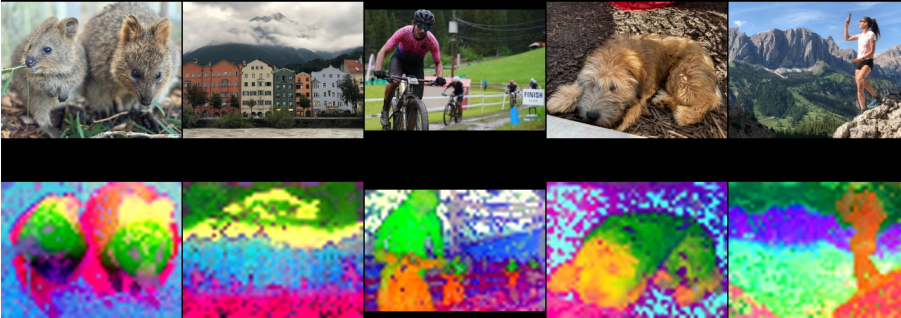   |
|          | 1022       |    |
|          | 2044       |    |
| RADIO    | 512        |   |
|          | 1024       |  |
|          | 2048       |  |

## C. ViTDet Augmentation

The following python code shows how the alternating window/global architecture of ViTDet [34] can be applied to a transformer. We take advantage of the fact that transformers are permutation invariant *after position encodings have been applied*, and thus it's easy to organize the patch order such that contiguous chunks of patches belong to the same window. Once reordered in this way, alternating between windowed and global attention is achieved simply by absorbing the windows into the batch dimension or returning to the original shape respectively. We also enforce that the final transformer layer always applies global attention.

```
from einops import rearrange
def reorder_patches(patches: torch.Tensor,
```

```

        patched_size: Tuple[int, int],
        window_size: int):
    p_idx = torch.arange(patches.shape[1])
    p_idx = rearrange(p_idx, '(wy y wx x) -> (wy wx y x)',
                    wy=patched_size[0] // window_size, y=window_size,
                    wx=patched_size[1] // window_size, x=window_size)
    p_idx = p_idx.reshape(1, -1, 1).expand_as(patches)

    return torch.gather(patches, p_idx), p_idx

def vitdet_aug(blocks: nn.Sequential,
              patches: torch.Tensor,
              patched_size: Tuple[int, int],
              window_sizes: List[int],
              num_windowed: int):
    B, T, C = patches.shape
    window_size = sample(window_sizes)
    sq_window_size = window_size ** 2
    patches, p_idx = reorder_patches(patches, patched_size, window_size)
    period = num_windowed + 1
    for i, block in enumerate(blocks[:-1]):
        if i % period == 0:
            patches = patches.reshape(B * sq_window_size, -1, C)
        elif i % period == num_windowed:
            patches = patches.reshape(B, T, C)
        patches = block(patches)

    # Always use global attention with the last block
    patches = patches.reshape(B, T, C)
    patches = blocks[-1](patches)

    # Finally, put the patches back in input order
    ret = torch.empty_like(patches)
    ret = ret.scatter(dim=1, index=p_idx, src=patches)
    return ret

```

## D. Comparison with SAM-CLIP [56]

Concurrently with our work, SAM-CLIP was introduced as a method of fusing SAM and CLIP into a single model. Due to the concurrency of effort, we don't compare our model with the full suite of metrics demonstrated in their method, however, we do have some overlap in key metrics such as Zero-Shot ImageNet-1k, and ADE20k semantic segmentation via linear probing. We present the comparison in table 9, however we note that there are enough differences between these two models that we can't conclude one way or another what is the superior approach. Instead we'll argue that DINOv2 does a better job of ADE20k linear probing than SAM, and thus our significantly higher quality on this metric is likely due to the inclusion of DINOv2, which is a key introduction with our approach.

## E. Automatic Loss Balancing

### E.1. Uncertainty

Following [11], we have:

$$L(x) = \sum_k \frac{1}{2\sigma_k^2} L_k(x) + \log \sigma_k \quad (4)$$

| Family   | Model       | Zero-Shot   | ADE20k      |
|----------|-------------|-------------|-------------|
| SAM      | ViTDet-H/16 |             | 28.2        |
| DFN CLIP | ViT-H/14    | <b>83.9</b> | 31.7        |
| SAM-CLIP | ViTDet-B/16 | 71.7        | 38.4        |
| RADIO    | ViT-H/14    | 82.7        | <b>51.3</b> |

Table 9. We compare our common key metrics with those demonstrated in SAM-CLIP [56]. We note that there are numerous differences between the two approaches, including model capacity and architecture. SAM-CLIP uses the ViT-B variant of SAM as a starting point, which implies it’s a ViTDet-B/16 architecture. As a result of this choice, their metrics are computed at a resolution of 1024. RADIO trains a vanilla ViT-H/14 from scratch, and as a result of the flexibility gained via the CPE method, we evaluate Zero-Shot ImageNet1k at a resolution of 432, and we run ADE20k linear probing at a resolution of 512 using the exact same weights. We note that Zero-Shot quality is largely determined by the quality of the CLIP teacher and the capacity of the student. We attribute our superior quality on ADE20k semantic segmentation largely to our inclusion of DINOv2 as a teacher.

where the  $\sigma_k$  values are predicted by the student. In practice, the student predicts  $b := \log \sigma_k^2$  for numerical stability, to avoid division by zero, and to regress unconstrained scalar values.

We make some minor modifications to (4) to make training a bit more stable in our setting. We replace the manual  $\lambda$  scalars with the learned uncertainty weights, and add the loss term for large uncertainties. Altogether, this yields:

$$\lambda_k = \frac{e^{-b_k}}{2}$$

$$L(x) = \sum_k \lambda_k L_k(x) + \frac{b_k}{2} \tag{5}$$

Let  $b_i^{(s|v)}(x'|\Theta_i^{(s)})$  be a learned function predicting balance parameters for teacher  $i$  and summary weight ( $s$ ) or feature vector weight ( $v$ ), we transform equation (5) slightly to:

$$\psi(x) = \log(1 + e^x)$$

$$\lambda_i^{(m)} = e^{-b_i^{(m)}(x')}$$

$$L(x) = \sum_i \sum_{m \in \{s,v\}} \lambda_i^{(m)} L_i^{(m)}(x) + \psi\left(b_i^{(m)}(x')\right) \tag{6}$$

The function  $\psi(x)$  is the familiar “softplus” nonlinear activation function. We drop the division by 2 on the left because, assuming outputs are initially  $b \sim \mathcal{N}(0, \sigma^2)$ , then the loss weights will initially have an expected value of 1, matching the naive weighting. On the right, we replace  $\frac{b_k}{2}$  with  $\psi(x)$  for a few reasons:

- When  $x \gtrsim 4$ , then  $\psi(x) \approx x$ , yielding the same expression as before.
- When  $x \approx 0$ , then  $\psi'(x) \approx \frac{1}{2}$ , yielding the same expression as before.
- When  $x < 0$ , which translates to a loss weight  $> 1$ ,  $\psi'(x) \rightarrow 0$ , improving stability as the weight gets larger.
- It has range  $(0, \infty)$  which aesthetically enforces the loss to be greater than zero.

## E.2. AdaLoss

In addition to uncertainty auto-balancing, we also explored AdaLoss [25]. In this formulation, we have:

$$\lambda_i^{(m)} = \frac{1}{\mathbb{E}(L_i^{(m)})}$$

$$L(x) = \sum_i \sum_{m \in \{s,v\}} \lambda_i^{(m)} L_i^{(m)}(x) \tag{7}$$

## F. Visual Question Answering Samples

Figures 8 to 12 show sample questions from our Visual Question Answering datasets, together with sample answers when using our vision encoders in a LLaVA setup.



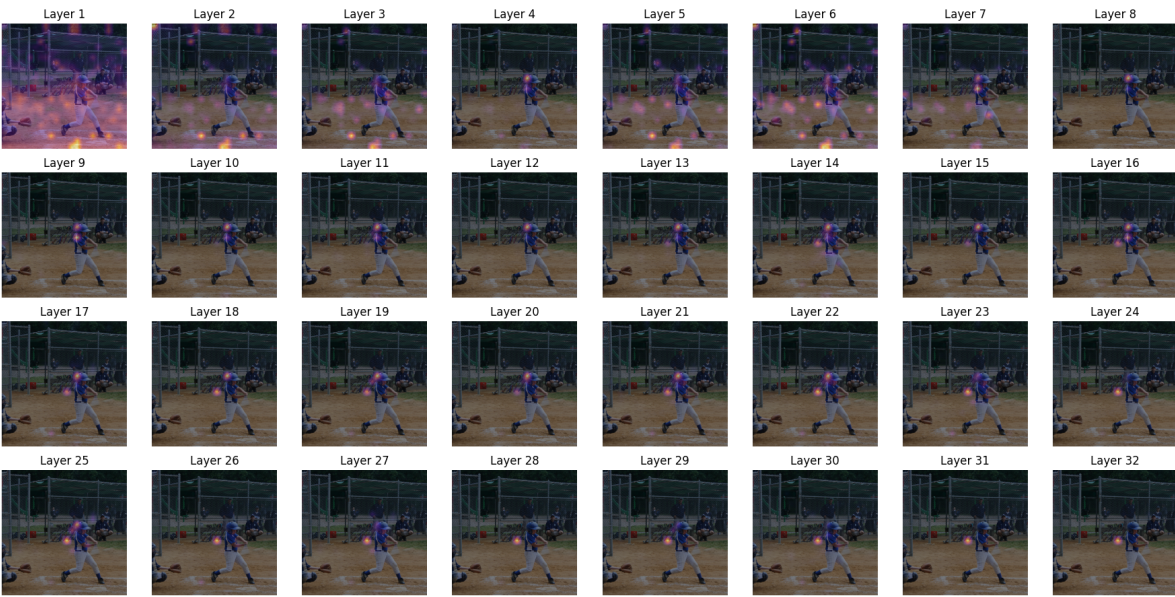

Figure 7. Visualization of the LLaVA attention maps over the visual features produced by a RADIO encoder. We use one sample image from the GQA[27] validation set and one associated question: "What color is the helmet in the middle of the image?". For each layer in the language model, we retrieve attention scores for all positions of the visual tokens, average them over all attention heads, and overlay corresponding heat maps with the input image. We can see that as we progress through the layers, the model's attention focuses on the relevant part of the image. The model's answer is "Blue".

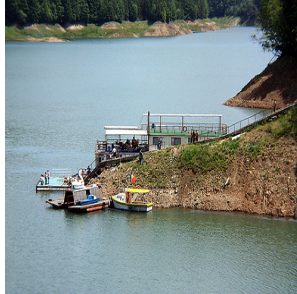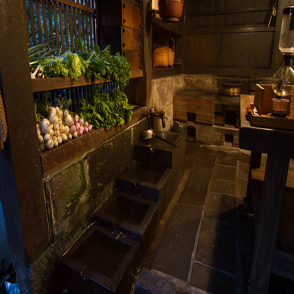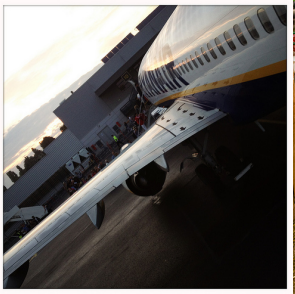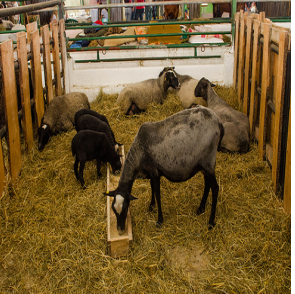

| MetaCLIP                                                                                                                                                                                                                                               | DINO-g14 | RADIO-H14 | E-RADIO | MetaCLIP                                                                                                                                                                                                                                                                    | DINO-g14 | RADIO-H14 | E-RADIO | MetaCLIP                                                                                                                                                                                                                                        | DINO-g14 | RADIO-H14 | E-RADIO | MetaCLIP                                                                                                                                                                                                                              | DINO-g14 | RADIO-H14 | E-RADIO |
|--------------------------------------------------------------------------------------------------------------------------------------------------------------------------------------------------------------------------------------------------------|----------|-----------|---------|-----------------------------------------------------------------------------------------------------------------------------------------------------------------------------------------------------------------------------------------------------------------------------|----------|-----------|---------|-------------------------------------------------------------------------------------------------------------------------------------------------------------------------------------------------------------------------------------------------|----------|-----------|---------|---------------------------------------------------------------------------------------------------------------------------------------------------------------------------------------------------------------------------------------|----------|-----------|---------|
| Q: Does the boat to the left of the flag look small or large? A: small<br>small green small green<br>Q: Click the boat to the left of the other boat small and white? A: yes<br>No pink Yes green                                                      |          |           |         | Q: Which kind of furniture is to the right of the drawers? A: shelves<br>shelves green shelves green<br>Q: Click the lamp to the right or to the left of the part? A: right<br>Right green Right green<br>Q: Click the pan to the right of a bowl? A: no<br>No pink No pink |          |           |         | Q: Who is in front of the gray building? A: passengers<br>People pink People pink<br>Q: Are the passengers in front of? A: building<br>Building green Building green<br>Q: Are there any doors or cars in the picture? A: no<br>No pink No pink |          |           |         | Q: What is the color of the horse made of metal? A: green<br>Green green Green green<br>Q: Which kind of animal is to the right of the sheep? A: cow<br>Cow pink Cow pink<br>Q: What is the small animal? A: cow<br>Cow pink Cow pink |          |           |         |
| Q: Are the items of furniture to the right of the vegetation that are not rotten called? A: shelves<br>Shelves green Shelves green<br>Q: Which kind of appliance is to the right of the shelf? A: stove<br>Stove pink Stove pink                       |          |           |         | Q: Are there any doors or cars in the picture? A: no<br>No pink No pink<br>Q: Are there any dishes or cups in the picture? A: no<br>No pink No pink                                                                                                                         |          |           |         | Q: What type of animal is to the right of the black animal? A: cow<br>Cow pink Cow pink<br>Q: Are there both fences and goats in this photograph? A: yes<br>No pink Yes green                                                                   |          |           |         |                                                                                                                                                                                                                                       |          |           |         |
| Q: Click the wood stove to the left of the shelf? A: no<br>No pink No pink<br>Q: Which kind of furniture is to the left of the part? A: shelf<br>Shelf pink Shelf pink<br>Q: Which kind of material makes up the above? A: wood<br>Wood pink Wood pink |          |           |         | Q: Does the floor grass or not? A: gray<br>Gray pink Gray pink<br>Q: Click the wood stove to the right or to the left of the shelf? A: right<br>Right pink Right pink<br>Q: Which kind of furniture is to the left of the shelves? A: drawers<br>Drawers pink Drawers pink  |          |           |         | Q: What is the animal to the right of the goat on the left? A: cow<br>Cow pink Cow pink<br>Q: Are there other fences or sheep that are not black? A: no<br>No pink No pink                                                                      |          |           |         |                                                                                                                                                                                                                                       |          |           |         |
| Q: What is the color of the container that is filled with water? A: brown<br>Brown pink Brown pink<br>Q: Are the shelves and the equipment made of the same material? A: yes<br>No pink No pink                                                        |          |           |         | Q: Does the top look white and large? A: no<br>No pink No pink<br>Q: Does the top look white and large? A: no<br>No pink No pink                                                                                                                                            |          |           |         | Q: Are there both a fence and a goat in the photo? A: yes<br>No pink Yes green                                                                                                                                                                  |          |           |         |                                                                                                                                                                                                                                       |          |           |         |
| Q: Click the wood stove to the left of the appliance the pot is on? A: no<br>No pink No pink<br>Q: Are there any baskets on top of the shelf? A: no<br>No pink No pink                                                                                 |          |           |         | Q: Does the container that looks brown filled with water? A: yes<br>Yes pink Yes pink                                                                                                                                                                                       |          |           |         | Q: Does the goat's tail look small and gray? A: yes<br>Yes pink Yes pink                                                                                                                                                                        |          |           |         |                                                                                                                                                                                                                                       |          |           |         |
| Q: Click the shelves made of? A: wood<br>Wood pink Wood pink<br>Q: Click which side of the stove is the part? A: right<br>Right pink Right pink                                                                                                        |          |           |         | Q: Click which part of the picture is the container, the top, the bottom? A: bottom<br>Bottom pink Bottom pink<br>Q: Are there any lamps or beds in the photograph? A: yes<br>No pink No pink                                                                               |          |           |         | Q: Click the sheep to the right in the left of the animal that is not big? A: left<br>Right pink Right pink                                                                                                                                     |          |           |         |                                                                                                                                                                                                                                       |          |           |         |
| Q: Click the drawers in the bottom part or to the top of the picture? A: top<br>Bottom pink Bottom pink                                                                                                                                                |          |           |         | Q: Click the floor made of? A: brick<br>Brick pink Brick pink                                                                                                                                                                                                               |          |           |         | Q: Click the animal on to the left of the small animal? A: goat<br>Goat pink Goat pink                                                                                                                                                          |          |           |         |                                                                                                                                                                                                                                       |          |           |         |
| Q: Click the floor made of? A: brick<br>Brick pink Brick pink                                                                                                                                                                                          |          |           |         | Q: Click the floor made of? A: brick<br>Brick pink Brick pink                                                                                                                                                                                                               |          |           |         | Q: Click the sheep to the right in the left of the animal that is not big? A: left<br>Right pink Right pink                                                                                                                                     |          |           |         |                                                                                                                                                                                                                                       |          |           |         |
| Q: Click the wood stove to the left of the wood table? A: no<br>No pink No pink                                                                                                                                                                        |          |           |         | Q: Click the wood stove to the right of the wood table? A: no<br>No pink No pink                                                                                                                                                                                            |          |           |         | Q: Click the sheep to the right in the left of the animal that is not big? A: left<br>Right pink Right pink                                                                                                                                     |          |           |         |                                                                                                                                                                                                                                       |          |           |         |
| Q: Click the item of furniture to the left of the shelves made of wood? A: shelf<br>Shelf pink Shelf pink                                                                                                                                              |          |           |         | Q: Click the item of furniture to the left of the shelves made of wood? A: shelf<br>Shelf pink Shelf pink                                                                                                                                                                   |          |           |         | Q: Click the sheep to the right in the left of the animal that is not big? A: left<br>Right pink Right pink                                                                                                                                     |          |           |         |                                                                                                                                                                                                                                       |          |           |         |
| Q: Click the wood stove to the left of the wood table? A: no<br>No pink No pink                                                                                                                                                                        |          |           |         | Q: Click the wood stove to the right of the wood table? A: no<br>No pink No pink                                                                                                                                                                                            |          |           |         | Q: Click the sheep to the right in the left of the animal that is not big? A: left<br>Right pink Right pink                                                                                                                                     |          |           |         |                                                                                                                                                                                                                                       |          |           |         |
| Q: Click the item of furniture to the left of the shelves made of wood? A: shelf<br>Shelf pink Shelf pink                                                                                                                                              |          |           |         | Q: Click the item of furniture to the left of the shelves made of wood? A: shelf<br>Shelf pink Shelf pink                                                                                                                                                                   |          |           |         | Q: Click the sheep to the right in the left of the animal that is not big? A: left<br>Right pink Right pink                                                                                                                                     |          |           |         |                                                                                                                                                                                                                                       |          |           |         |
| Q: Click the wood stove to the left of the wood table? A: no<br>No pink No pink                                                                                                                                                                        |          |           |         | Q: Click the wood stove to the right of the wood table? A: no<br>No pink No pink                                                                                                                                                                                            |          |           |         | Q: Click the sheep to the right in the left of the animal that is not big? A: left<br>Right pink Right pink                                                                                                                                     |          |           |         |                                                                                                                                                                                                                                       |          |           |         |
| Q: Click the item of furniture to the left of the shelves made of wood? A: shelf<br>Shelf pink Shelf pink                                                                                                                                              |          |           |         | Q: Click the item of furniture to the left of the shelves made of wood? A: shelf<br>Shelf pink Shelf pink                                                                                                                                                                   |          |           |         | Q: Click the sheep to the right in the left of the animal that is not big? A: left<br>Right pink Right pink                                                                                                                                     |          |           |         |                                                                                                                                                                                                                                       |          |           |         |

Figure 8. Sample questions from the GQA[27] and their answers from our LLaVA models, using various image encoders. Answers are painted green when they match the ground truth, pink otherwise.

| MetaCLIP                                                                                  | DINO-g14 | RADIO-H14 | E-RADIO | MetaCLIP                                                                              | DINO-g14       | RADIO-H14      | E-RADIO    | MetaCLIP                                                                               | DINO-g14 | RADIO-H14 | E-RADIO  | MetaCLIP                                                            | DINO-g14 | RADIO-H14 | E-RADIO |
|-------------------------------------------------------------------------------------------|----------|-----------|---------|---------------------------------------------------------------------------------------|----------------|----------------|------------|----------------------------------------------------------------------------------------|----------|-----------|----------|---------------------------------------------------------------------|----------|-----------|---------|
| Q: Does the woman to the left or the right of the man that is wearing trousers? A: left   | Left     | Right     | Right   | Q: Does the remote control to the left of the other remote control look black? A: yes | Yes            | Yes            | Yes        | Q: Is it outdoors or outdoors? A: outdoors                                             | Outdoors | Outdoors  | Outdoors | Q: Does the ball look soft? A: no                                   | No       | No        | No      |
| Q: Who is wearing a shirt? A: man                                                         | Man      | Woman     | Woman   | Q: What is the device above the box? A: controller                                    | Television     | Television     | Television | Q: Which side of the photo is the orange vegetable on? A: right                        | Right    | Right     | Right    | Q: Is the baseball the same color as the ball? A: no                | No       | No        | No      |
| Q: What is the bag in the top part or in the bottom of the photo? A: bottom               | Bottom   | Bottom    | Bottom  | Q: Which kind of device is above the box? A: controller                               | Television     | Television     | Television | Q: Does the steel look gray? A: no                                                     | No       | No        | No       | Q: Which kind of clothing is gray? A: shorts                        | Shorts   | Shorts    | Shorts  |
| Q: Is the bag to the right of the other bag tan or black? A: black                        | Black    | Tan       | Tan     | Q: Is the controller above the controller to the left of the speaker? A: yes          | Yes            | Yes            | Yes        | Q: On which side of the picture is the person? A: right                                | Right    | Right     | Right    | Q: Which piece is 0? A: fast                                        | Fast     | Fast      | Fast    |
| Q: Who is wearing the shirt? A: man                                                       | Man      | Man       | Woman   | Q: Are there any tables or couches that are not tan? A: no                            | No             | No             | No         | Q: Does the baseball look light? A: yes                                                | Yes      | Yes       | Yes      | Q: Is the shirt the same color as the ball? A: yes                  | Yes      | Yes       | Yes     |
| Q: What is the color of the shirt? A: black                                               | Black    | White     | Black   | Q: What is the color of the shirt? A: tan                                             | Brown          | Brown          | Brown      | Q: What animal is to the left of the house? A: giraffe                                 | Giraffe  | Giraffe   | Giraffe  | Q: Is the cap black? A: yes                                         | Yes      | Yes       | Yes     |
| Q: Do you see women to the left of the man that is wearing pants? A: no                   | No       | Yes       | Yes     | Q: What is the device on the carpet? A: speaker                                       | Remote control | Remote control | Television | Q: Is the giraffe to the left or the right of the person that is on the right? A: left | Left     | Left      | Left     | Q: What color are the tracks, gray or yellow? A: gray               | Gray     | Gray      | Gray    |
| Q: What does the man to the left of the traffic light wear? A: suit                       | Suit     | Jackie    | Jackie  | Q: Is there any speaker on the carpet? A: yes                                         | Yes            | Yes            | Yes        | Q: Which piece is 0? A: fast                                                           | Fast     | Fast      | Fast     | Q: What are the gray clothing items called? A: tracks               | Tracks   | Tracks    | Tracks  |
| Q: What vehicle is the black jacket painted on? A: van                                    | Van      | Van       | Van     | Q: What device is on the carpet? A: speaker                                           | Remote control | Remote control | Television | Q: Are there both horses and giraffes in the image? A: yes                             | Yes      | Yes       | Yes      | Q: What color does the shirt have? A: black                         | Black    | Black     | Black   |
| Q: What's painted on the door? A: logo                                                    | Nothing  | Nothing   | Logo    | Q: Which color is the speaker that is to the right of the camera? A: black            | Black          | Black          | Black      | Q: Which kind of animal is a, giraffe or horse? A: giraffe                             | Giraffe  | Giraffe   | Giraffe  | Q: Is the baseball and the number have a different color? A: yes    | Yes      | Yes       | Yes     |
| Q: What is the color of the shirt? A: yellow                                              | Yellow   | Yellow    | White   | Q: The remote on the top left or in the bottom of the photo? A: bottom                | Bottom         | Bottom         | Bottom     | Q: Is the person to the right or to the left of the animal near the house? A: right    | Right    | Right     | Right    | Q: What color does the shirt have? A: black                         | Black    | Black     | Black   |
| Q: Is the jacket different in color than the top? A: no                                   | Yes      | No        | No      | Q: What size is the device that is in the top of the image? A: small                  | Small          | Small          | Small      | Q: Is the person to the right of the animal near the house? A: yes                     | Yes      | Yes       | Yes      | Q: Is the baseball and the number have a different color? A: yes    | Yes      | Yes       | Yes     |
| Q: What color is the sweater the woman wears? A: white                                    | Black    | Brown     | Black   | Q: Is it outdoors? A: no                                                              | No             | No             | No         | Q: Is the horse on the right side? A: yes                                              | Yes      | Yes       | Yes      | Q: What kind of vegetable is to the right of the giraffe? A: carrot | Carrot   | Carrot    | Carrot  |
| Q: What does the woman wear? A: sweater                                                   | Jackie   | Jackie    | Jackie  | Q: Which part of the photo is the top, the bottom or the top? A: bottom               | Bottom         | Bottom         | Bottom     | Q: What kind of vegetable is to the right of the giraffe? A: carrot                    | Carrot   | Carrot    | Carrot   |                                                                     |          |           |         |
| Q: Is the blue bag in the bottom or in the top? A: bottom                                 | Bottom   | Bottom    | Bottom  | Q: Which part is the animal giraffe, the bottom or the top? A: top                    | Bottom         | Bottom         | Bottom     |                                                                                        |          |           |          |                                                                     |          |           |         |
| Q: What is the color of the jacket the man wears? A: black                                | Black    | Black     | Black   | Q: What is on the tan table? A: remote control                                        | Remote control | Remote control | Television |                                                                                        |          |           |          |                                                                     |          |           |         |
| Q: What is painted on the van to the right of the man? A: logo                            | Logo     | Logo      | Logo    | Q: Which kind of device is on the table? A: remote control                            | Remote control | Remote control | Television |                                                                                        |          |           |          |                                                                     |          |           |         |
| Q: Is the jacket different in color than the top? A: no                                   | Yes      | No        | No      | Q: What type of device is on the table? A: remote control                             | Remote control | Remote control | Television |                                                                                        |          |           |          |                                                                     |          |           |         |
| Q: Is the yellow vehicle in the top or to the left of the one that wears pants? A: left   | Left     | Left      | Left    | Q: What color is the carpet? A: gray                                                  | Gray           | Gray           | Gray       |                                                                                        |          |           |          |                                                                     |          |           |         |
| Q: Who is wearing a jacket? A: man                                                        | Man      | Man       | Man     |                                                                                       |                |                |            |                                                                                        |          |           |          |                                                                     |          |           |         |
| Q: Does the woman to the right of the man carrying a bag? A: yes                          | Yes      | Yes       | No      |                                                                                       |                |                |            |                                                                                        |          |           |          |                                                                     |          |           |         |
| Q: What is the woman that is to the right of the man carrying? A: bag                     | Bag      | Bag       | Bag     |                                                                                       |                |                |            |                                                                                        |          |           |          |                                                                     |          |           |         |
| Q: Does the door look white? A: yes                                                       | Yes      | No        | No      |                                                                                       |                |                |            |                                                                                        |          |           |          |                                                                     |          |           |         |
| Q: Who is wearing pants? A: man                                                           | Man      | Man       | Man     |                                                                                       |                |                |            |                                                                                        |          |           |          |                                                                     |          |           |         |
| Q: Are there either chairs or logs? A: yes                                                | Yes      | Yes       | No      |                                                                                       |                |                |            |                                                                                        |          |           |          |                                                                     |          |           |         |
| Q: Are there blue bags or cars? A: yes                                                    | Yes      | Yes       | Yes     |                                                                                       |                |                |            |                                                                                        |          |           |          |                                                                     |          |           |         |
| Q: Which side of the picture is the van on? A: right                                      | Right    | Right     | Right   |                                                                                       |                |                |            |                                                                                        |          |           |          |                                                                     |          |           |         |
| Q: On which side of the picture is the woman? A: left                                     | Left     | Left      | Left    |                                                                                       |                |                |            |                                                                                        |          |           |          |                                                                     |          |           |         |
| Q: Is the blue bag to the right or to the left of the woman that wears a sweater? A: left | Left     | Left      | Left    |                                                                                       |                |                |            |                                                                                        |          |           |          |                                                                     |          |           |         |
| Q: Is the man to the left of the bus wearing shorts? A: no                                | No       | No        | No      |                                                                                       |                |                |            |                                                                                        |          |           |          |                                                                     |          |           |         |
| Q: Who is wearing the pants? A: man                                                       | Man      | Man       | Woman   |                                                                                       |                |                |            |                                                                                        |          |           |          |                                                                     |          |           |         |
| Q: Is the car different in color than the jacket? A: yes                                  | Yes      | Yes       | Yes     |                                                                                       |                |                |            |                                                                                        |          |           |          |                                                                     |          |           |         |
| Q: Is the color of the door different than the van? A: no                                 | No       | No        | No      |                                                                                       |                |                |            |                                                                                        |          |           |          |                                                                     |          |           |         |

Figure 9. Sample questions from the GQA[27] and their answers from our LLaVA models, using various image encoders. Answers are painted green when they match the ground truth, pink otherwise.

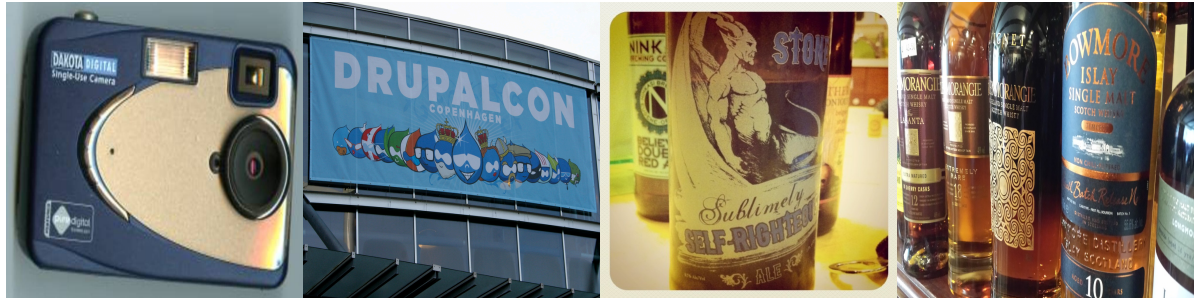

| MetaCLIP                                                                                     | DINO-g14       | RADIO-H14 | E-RADIO | MetaCLIP                                                        | DINO-g14  | RADIO-H14      | E-RADIO       | MetaCLIP                                                                                 | DINO-g14        | RADIO-H14 | E-RADIO         | MetaCLIP                                                                                           | DINO-g14 | RADIO-H14 | E-RADIO  |
|----------------------------------------------------------------------------------------------|----------------|-----------|---------|-----------------------------------------------------------------|-----------|----------------|---------------|------------------------------------------------------------------------------------------|-----------------|-----------|-----------------|----------------------------------------------------------------------------------------------------|----------|-----------|----------|
| Q:What is the brand of this camera? A: dakota, clos columbu, nous les gosses, dakota digital |                |           |         | Q:What does the small white text spell? A: copenhagen, thursday |           |                |               | Q:What kind of beer is this? A: self righteous, sublimely self-righteous ale, ale, stone |                 |           |                 | Q:What brand liquor is on the right? A: bowmore , bowmore, bowmore islay, dowmore islay            |          |           |          |
| Dakota                                                                                       | Dakota digital | Dakota    | Dakota  | Drupalcon cope                                                  | Rupertcon | Drupalcon cope | Palcon copenh | Self-righteous                                                                           | Stone self-rich | Ale       | Stone self-rich | Owmor                                                                                              | Morangie | Bowmore   | Morangie |
|                                                                                              |                |           |         |                                                                 |           |                |               |                                                                                          |                 |           |                 | Q:How long has the drink on the right been aged? A: 10 year, 10 years , 10, 10 years, martial arts |          |           |          |
|                                                                                              |                |           |         |                                                                 |           |                |               |                                                                                          |                 |           |                 | 10 years                                                                                           | 10 years | 10 years  | 10 years |

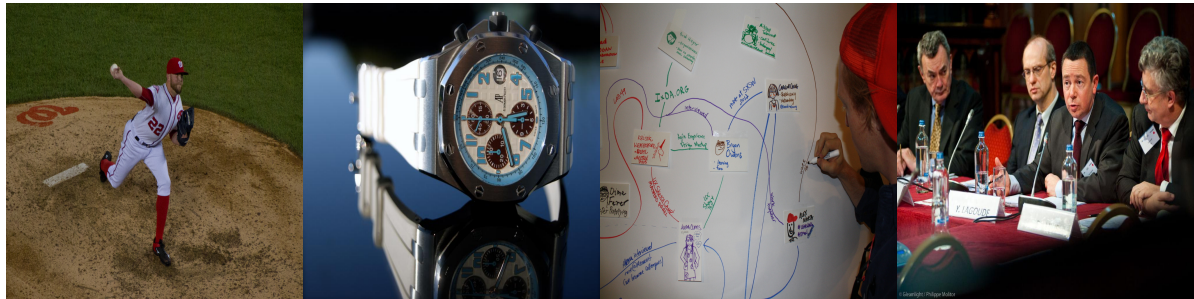

| MetaCLIP                                       | DINO-g14 | RADIO-H14 | E-RADIO | MetaCLIP                                                         | DINO-g14 | RADIO-H14 | E-RADIO | MetaCLIP                                                                                                   | DINO-g14 | RADIO-H14     | E-RADIO | MetaCLIP                                                                                                             | DINO-g14         | RADIO-H14        | E-RADIO          |
|------------------------------------------------|----------|-----------|---------|------------------------------------------------------------------|----------|-----------|---------|------------------------------------------------------------------------------------------------------------|----------|---------------|---------|----------------------------------------------------------------------------------------------------------------------|------------------|------------------|------------------|
| Q:What number is on the player's jersey? A: 22 |          |           |         | Q:What is the time? A: 5:42, 5:41, 8:00, 5:40                    |          |           |         | Q:Who is at the center of all of this? A: agile experience design makeup, bryan owens, alexa curtis, mahou |          |               |         | Q:Who was the photographer? A: philippe molitor, philippe molitar, no, philippe meltow, l. clardajne, philippe molda |                  |                  |                  |
| 22                                             | 22       | 22        | 22      | 11:00                                                            | 11:00    | 11:55     | 11:00   | Aithell                                                                                                    | Man      | Chris O'Leary | Owens   | Philippe molitor                                                                                                     | Philippe molitor | Philippe molitor | Philippe molitor |
|                                                |          |           |         | Q:What brand of watch is that? A: unanswerable, audemars, ap, af |          |           |         |                                                                                                            |          |               |         |                                                                                                                      |                  |                  |                  |
|                                                |          |           |         | Tissot                                                           | Tissot   | Tudor     | Rolex   |                                                                                                            |          |               |         |                                                                                                                      |                  |                  |                  |

Figure 10. Sample questions from the TextVQA [51] dataset and their answers from our LLaVA models, using various image encoders. Answers are painted green when they match the ground truth, pink otherwise.

| MetaCLIP                                                                   | DINO-g14 | RADIO-H14 | E-RADIO | MetaCLIP                            | DINO-g14 | RADIO-H14 | E-RADIO | MetaCLIP                                           | DINO-g14 | RADIO-H14 | E-RADIO | MetaCLIP                                                                                                                        | DINO-g14   | RADIO-H14 | E-RADIO |
|----------------------------------------------------------------------------|----------|-----------|---------|-------------------------------------|----------|-----------|---------|----------------------------------------------------|----------|-----------|---------|---------------------------------------------------------------------------------------------------------------------------------|------------|-----------|---------|
| Q: What is the 3 letter word to the left of casa in the text? A: fica, tua |          |           |         | Q: What year was this made? A: 2012 |          |           |         | Q: Is this a reference book? A: foreign words, yes |          |           |         | Q: What is the license plate number? A: jba, no numbers but the letters jba, items handed into london underground lost property |            |           |         |
| Libano                                                                     | Casa     | Jes       | Dos     | 2012                                | 2012     | 2012      | 2012    | Yes                                                | Yes      | Yes       | No      | JBA                                                                                                                             | BURLINGAME | Jiba      | Burl    |

| MetaCLIP                                                                                       | DINO-g14       | RADIO-H14 | E-RADIO        | MetaCLIP                                                                                   | DINO-g14    | RADIO-H14   | E-RADIO     | MetaCLIP                                                                                                                  | DINO-g14         | RADIO-H14      | E-RADIO          | MetaCLIP                                                                                                                                                                   | DINO-g14 | RADIO-H14        | E-RADIO |
|------------------------------------------------------------------------------------------------|----------------|-----------|----------------|--------------------------------------------------------------------------------------------|-------------|-------------|-------------|---------------------------------------------------------------------------------------------------------------------------|------------------|----------------|------------------|----------------------------------------------------------------------------------------------------------------------------------------------------------------------------|----------|------------------|---------|
| Q: What is the alcohol content? A: 9%, 2009, 9.0, 9.0% alc/vol, 9, smashed pumpkin, 9.0%, lego |                |           |                | Q: What is the beer brand front center? A: coors light, coors, coors light, secret         |             |             |             | Q: Who is usa today's bestselling author? A: cathy williams                                                               |                  |                |                  | Q: What is this food place selling? A: bratwurst, wurst, krainerwurst, burenwurst, hotdogs, krainerwurst and burenwurst, krainerwurst burenwurst, krainerwurst, burenwurst |          |                  |         |
| 9.0%                                                                                           | 9.0%           | 9.0%      | 9.0%           | Coors light                                                                                | Coors light | Coors light | Coors light | Cathy williams                                                                                                            | Cathy williams   | Cathy williams | Cathy williams   | Hot dog                                                                                                                                                                    | Hot dog  | Franz Debreziner | Hot dog |
| Q: What is the name of this ale? A: smashed pumpkin, shipyard, shipyard smashed pumpkin        |                |           |                | Q: What is the company name to the left of the coors logo? A: safeway, calculator, safeway |             |             |             | Q: What is the name of this bestselling books? A: secrets of a ruthless tycoon, cathy williams, secret of ruthless tycoon |                  |                |                  | Q: What is the top word on the sign on the left? A: krainerwurst                                                                                                           |          |                  |         |
| Smashed pumpk                                                                                  | Shipyard smash | Shipyard  | Shipyard smash | Coors                                                                                      | Coors       | Safeway     | Pg&e        | Cathy williams                                                                                                            | Harlequin Presse | Cathy williams | Harlequin presse | Krainerwurst                                                                                                                                                               | Hot dog  | Krainerwurst     | Hot dog |

Figure 11. Sample questions from the TextVQA [51] dataset and their answers from our LLaVA models, using various image encoders. Answers are painted green when they match the ground truth, pink otherwise.

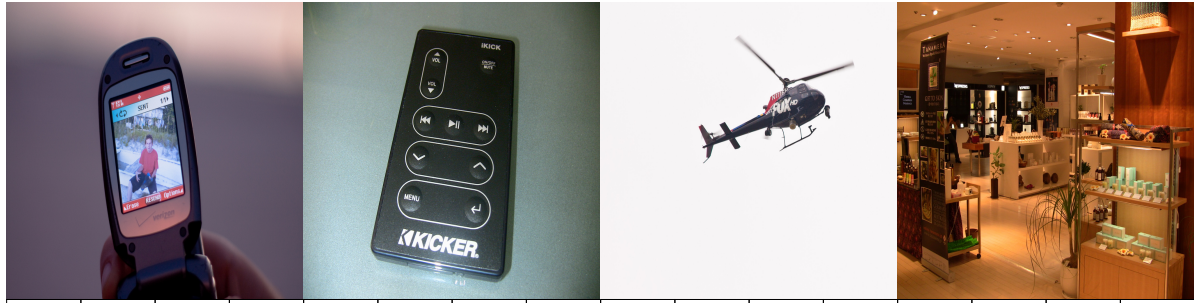

| MetaCLIP                                                                  | DINO-g14 | RADIO-H14 | E-RADIO | MetaCLIP                                      | DINO-g14  | RADIO-H14 | E-RADIO | MetaCLIP                                                     | DINO-g14 | RADIO-H14 | E-RADIO | MetaCLIP                                               | DINO-g14 | RADIO-H14 | E-RADIO |
|---------------------------------------------------------------------------|----------|-----------|---------|-----------------------------------------------|-----------|-----------|---------|--------------------------------------------------------------|----------|-----------|---------|--------------------------------------------------------|----------|-----------|---------|
| Q:What brand of cellphone is this? A: like you, verizon,<br>verizon nokia |          |           |         | Q:What brand is the remote control? A: kicker |           |           |         | Q:What channel is this helicopter from? A: joma, fox hd, fox |          |           |         | Q:What's the name of the store? A: tanamira, tanamera, |          |           |         |
| Verizon                                                                   | Verizon  | Verizon   | Verizon | Kicker                                        | Kickstick | Kicker    | Kick    | Fox                                                          | Fux nit  | Fux       | Fux     | Ana                                                    | Ana mer  | Anamela   | Ana mer |
| Q:Was this picture sent? A: le web, yes                                   |          |           |         | Q:What is the text to the right of fox? A: hd |           |           |         | Q:What is the text to the right of fox? A: hd                |          |           |         | Q:What is the text to the right of fox? A: hd          |          |           |         |
| Yes                                                                       | Yes      | Yes       | Yes     | Fox                                           | NIT       | Fox 1     | Nitro   | Fox                                                          | NIT      | Fox 1     | Nitro   | Fox                                                    | NIT      | Fox 1     | Nitro   |

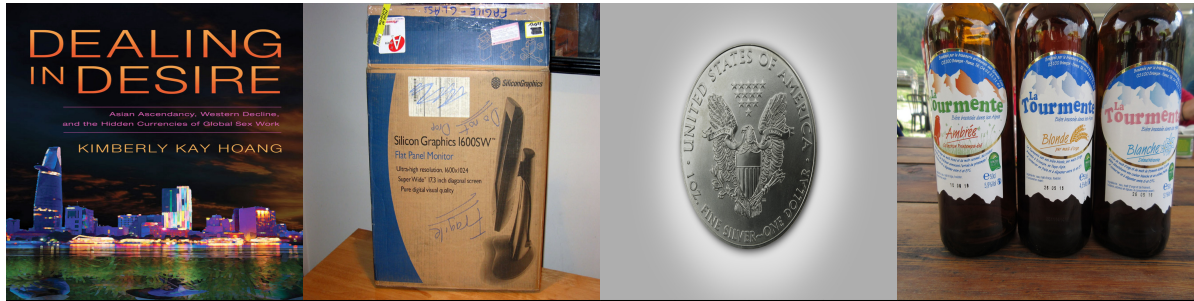

| MetaCLIP                                                 | DINO-g14                               | RADIO-H14                              | E-RADIO                                | MetaCLIP                                                      | DINO-g14                                     | RADIO-H14                                    | E-RADIO                                      | MetaCLIP                                                      | DINO-g14 | RADIO-H14 | E-RADIO | MetaCLIP                                                       | DINO-g14 | RADIO-H14 | E-RADIO |
|----------------------------------------------------------|----------------------------------------|----------------------------------------|----------------------------------------|---------------------------------------------------------------|----------------------------------------------|----------------------------------------------|----------------------------------------------|---------------------------------------------------------------|----------|-----------|---------|----------------------------------------------------------------|----------|-----------|---------|
| Q:Who is the author of this book? A: kimberly kay hoant, |                                        |                                        |                                        | Q:What is the company on the box? A: silicongraphics, silicon |                                              |                                              |                                              | Q:How much does the coin weight? A: 1oz, 1 oz., 1 ounce, 1 oz |          |           |         | Q:What is the flavor of the beer on the left? A: amber, ambree |          |           |         |
| kimberly kay hoang, kimberly kay hoang                   | kimberly kay hoang, kimberly kay hoang | kimberly kay hoang, kimberly kay hoang | kimberly kay hoang, kimberly kay hoang | graphics, silicon graphics, silicon graphics                  | graphics, silicon graphics, silicon graphics | graphics, silicon graphics, silicon graphics | graphics, silicon graphics, silicon graphics | 104                                                           | 104      | 1 oz      | 104     | Tourmente                                                      | Blonde   | Blonde    | Blanche |
| Kimberly Kay H                                           | Kimberly Kay H                         | Kimberly Kay H                         | Kimberly Kay H                         | Silicon graphics                                              | Silicon graphics                             | Silicon graphics                             | Silicon graphics                             | Q:Now coin using or not? A: unanswerable, no, answering       |          |           |         | Q:How wide is the diagonal screen? A: 17.3, 17.3 inch, 17.3    |          |           |         |
| Q:What is the book title? A: dealing in desire           |                                        |                                        |                                        | Q:How wide is the diagonal screen? A: 17.3, 17.3 inch, 17.3   |                                              |                                              |                                              | does not require reading text in the image                    |          |           |         | Q:How wide is the diagonal screen? A: 17.3, 17.3 inch, 17.3    |          |           |         |
| Dealing in Desir                                         | Dealing in Desir                       | Dealing in Desir                       | Dealing in desir                       | 1600                                                          | 1600                                         | 1600                                         | 1600                                         | Not                                                           | Not      | Not       | Not     | 1600                                                           | 1600     | 1600      | 1600    |

Figure 12. Sample questions from the TextVQA [51] dataset and their answers from our LLaVA models, using various image encoders. Answers are painted green when they match the ground truth, pink otherwise.
